# Supplementary material for: Optimizing the Synthetic Conditions of “Green” Colloidal AgBiS2 Nanocrystals Using a Low-Cost Sulfur Source
Source: MDPI journal article supplement (doi:10.3390/nano12213742), 2022-10-25
Supplement: s1 [file s1]

## Supporting Information

### Optimizing the Synthetic Conditions of “Green” Colloidal AgBiS<sub>2</sub> Nanocrystals Using Low-Cost Sulfur Source

**Qiao Li <sup>1</sup>, Xiaosong Zheng <sup>1</sup>, Xiaoyu Shen <sup>1</sup>, Shuai Ding <sup>1</sup>, Hongjian Feng <sup>1,\*</sup>,  
Guohua Wu <sup>2,\*</sup>, Yaohong Zhang <sup>1,3\*</sup>**

<sup>1</sup> School of Physics, Northwest University, Xi'an 710127, China

<sup>2</sup> Qingdao Innovation and Development Base of Harbin Engineering University, Harbin Engineering University, Heilongjiang 150001, China

<sup>3</sup> Shaanxi Key Laboratory for Carbon Neutral Technology, Xi'an 710127, China

\*Corresponding authors:

Yaohong Zhang: yhzhang@nwu.edu.cn

Hong-Jian Feng: hjfeng@nwu.edu.cn

Guohua Wu: ghwu@hrbeu.edu.cn

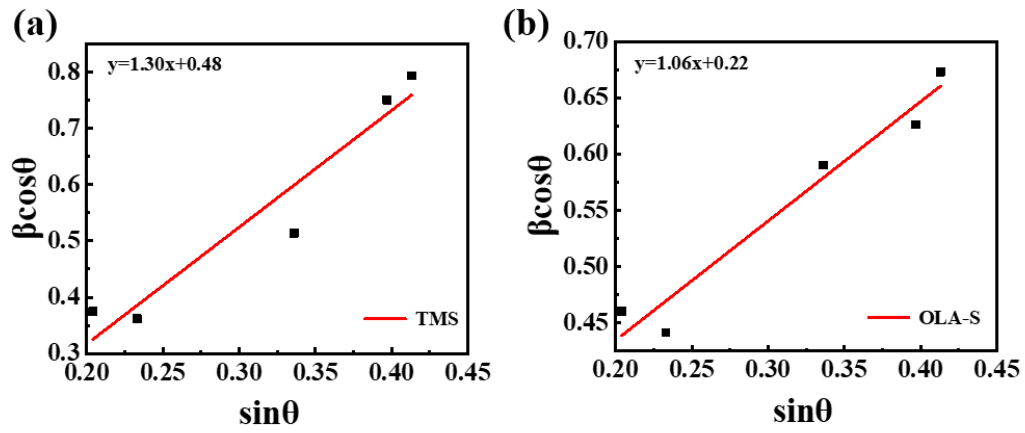

**Figure S1.** The William-Hall plots for (a) TMS-based and (b) OLA-S-based colloidal  $\text{AgBiS}_2$  NCs.

The relationship between full width at half maximum of XRD peak ( $\beta$ ) and lattice strain ( $\epsilon$ ) follows the Williamson-Hall equation: <sup>[1,2]</sup>

$$\beta \cos \theta = 4\epsilon \sin \theta + \frac{K\lambda}{D_{\text{size}}} \quad \text{eq. (1)}$$

where  $\theta$  is the Bragg angle in radian,  $K$  is the sharp factor ( $K=0.94$ ),  $\lambda$  is the wavelength of X-ray ( $\text{CuK}\beta$ ) in nanometers ( $\lambda=0.14$  nm), and  $D_{\text{size}}$  is the average NC size in nanometers, respectively. The lattice strain,  $\epsilon$ , can be evaluated from the slope of the linear fitting of the data when  $\beta \cos \theta$  is plotted on the y axis and  $\sin \theta$  is plotted on the x axis. The fitting results are shown in Table S1.

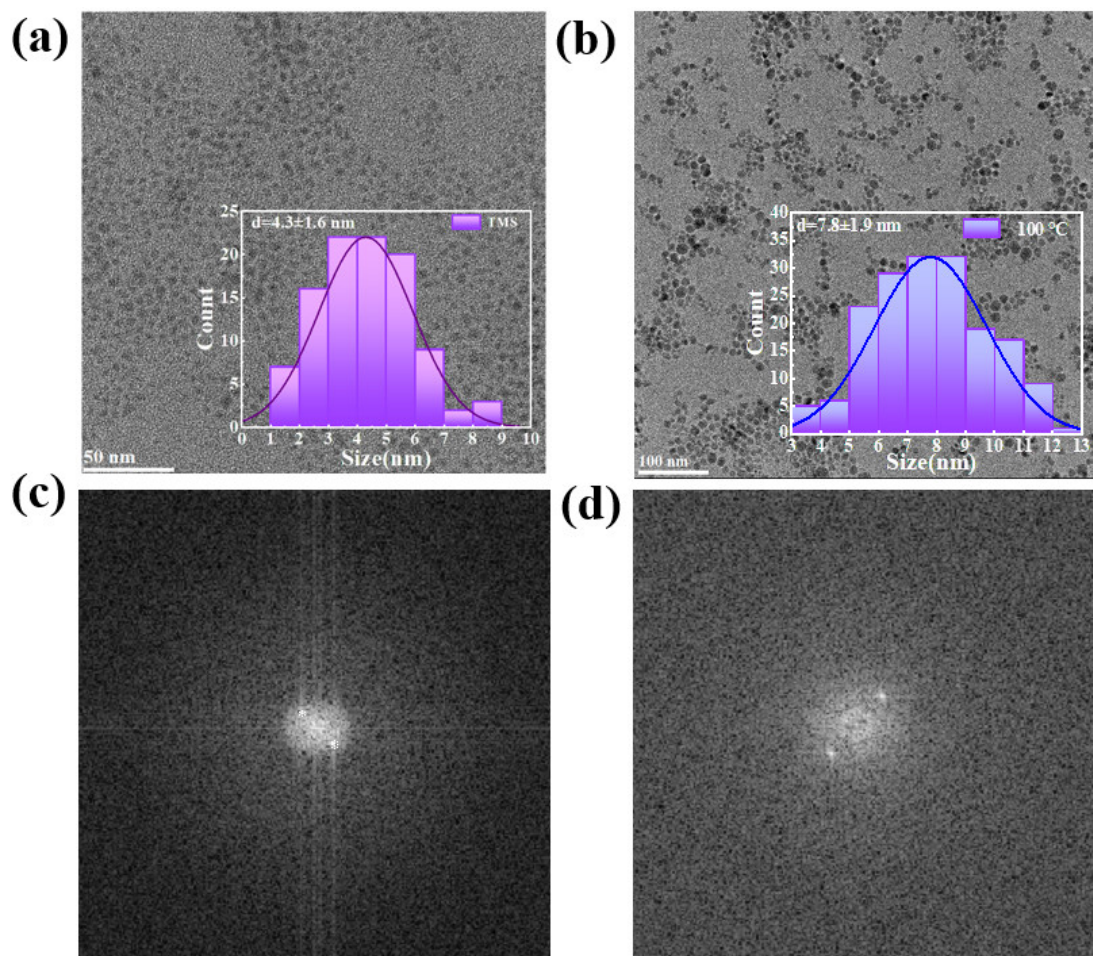

**Figure S2.** TEM images of (a) TMS-based and (b) OLA-S-based colloidal AgBiS<sub>2</sub> NCs. Insets are the statistical histograms of the NCs size distribution. SAED images of (c) TMS-based and (d) OLA-S-based colloidal AgBiS<sub>2</sub> NCs.

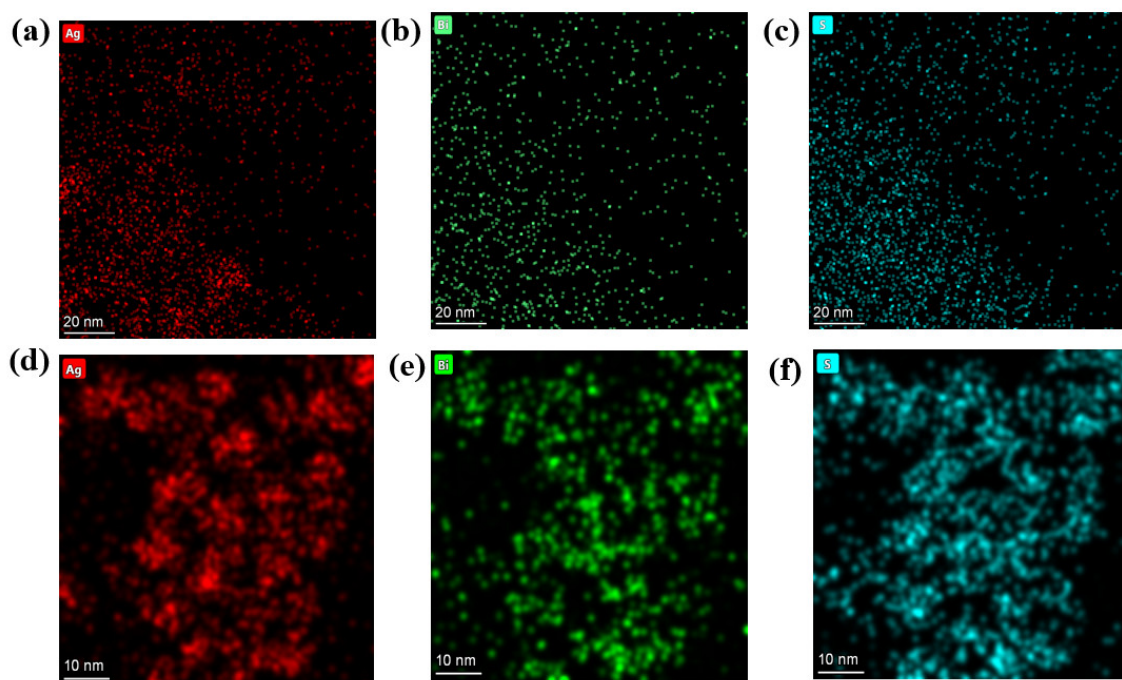

**Figure S3.** EDS-Mapping images of (a) Ag, (b) Bi and (c) S of TMS-based. EDS-Mapping images of (d) Ag, (e) Bi and (f) S of OLA-S-based colloidal AgBiS<sub>2</sub> NCs.

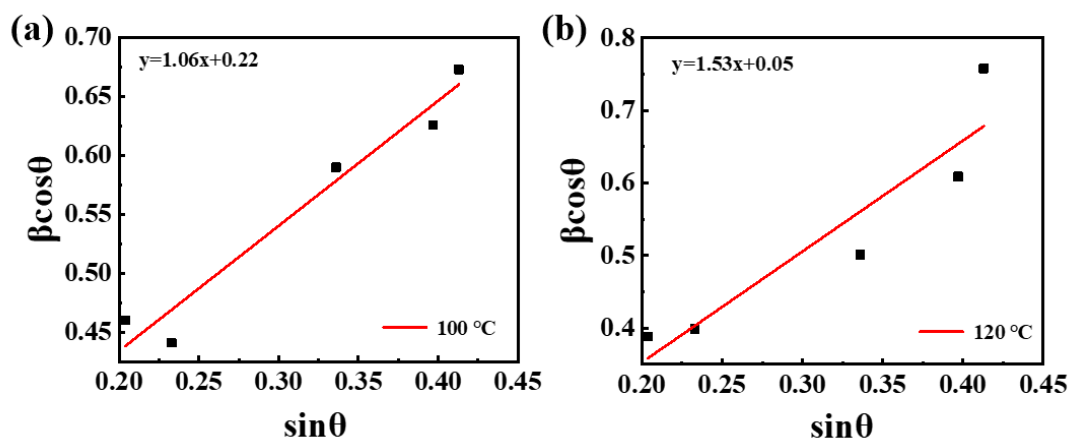

**Figure S4.** The William-Hall plots for OLA-S-based colloidal AgBiS<sub>2</sub> NCs prepared at (a) 100 °C and (b) 120 °C.

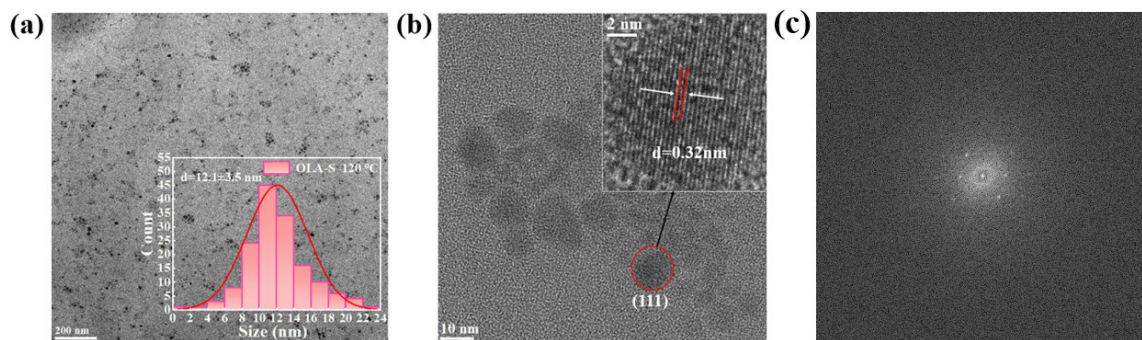

**Figure S5.** TEM images of (a) OLA-S-based colloidal AgBiS<sub>2</sub> NCs prepared at 120°C. Insets are the statistical histograms of the NCs size distribution. (b) HR-TEM images of OLA-S-based colloidal AgBiS<sub>2</sub> NCs prepared at 120°C. (c) SAED image of OLA-S-based colloidal AgBiS<sub>2</sub> NCs prepared at 120°C.

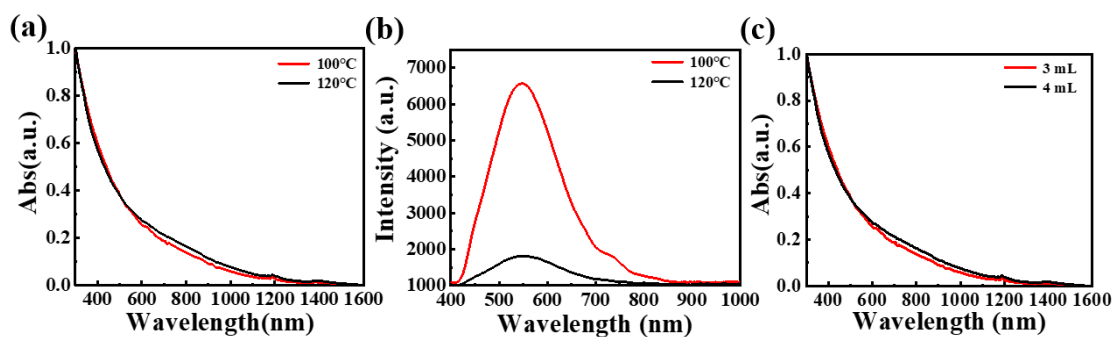

**Figure S6.** (a) UV-vis-NIR absorption spectra of the colloidal AgBiS<sub>2</sub> NCs in hexane. (b) PL spectrum and fitting curves of OLA-S-based colloidal AgBiS<sub>2</sub> NCs prepared at 100°C and 120°C. (c) UV-vis-NIR absorption spectra of the 3 mL and 4 mL colloidal AgBiS<sub>2</sub> NCs in hexane.

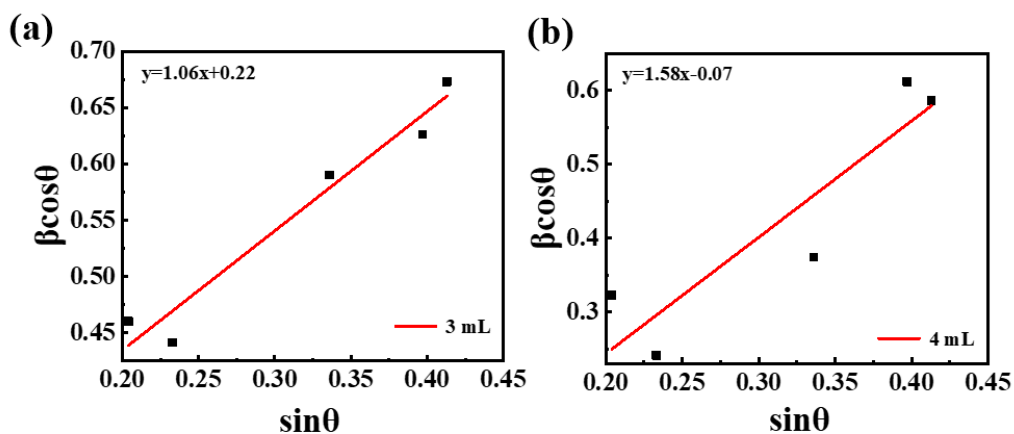

**Figure S7.** The William-Hall plots for (a) 3 mL and (b) 4 mL OLA-S-based colloidal AgBiS<sub>2</sub> NCs.

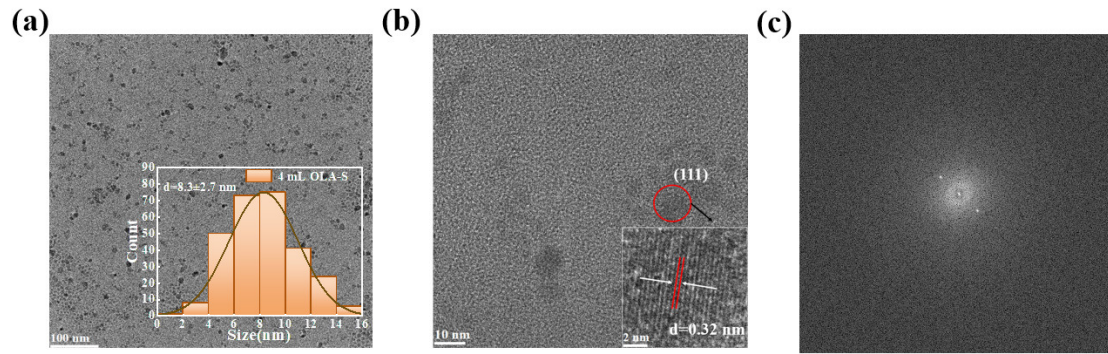

**Figure S8.** TEM images of (a) 4 mL OLA-S-based colloidal AgBiS<sub>2</sub> NCs. Inset is the statistical histograms of the NCs size distribution. (b) HR-TEM images of 4 mL OLA-S-based colloidal AgBiS<sub>2</sub> NCs. (c) SAED image of 4 mL OLA-S-based colloidal AgBiS<sub>2</sub> NCs.

**Table S1.** Half-peak widths and lattice strains of OLA-S-based and TMS-based colloidal AgBiS<sub>2</sub> NCs.

| Sulfur source | Crystal plane | Half-peak wide(nm) | Lattice strain |
|---------------|---------------|--------------------|----------------|
| OLA-S         | (111)         | 3.51               | 0.27           |
|               | (200)         | 2.95               |                |
|               | (220)         | 2.73               |                |
|               | (311)         | 3.45               |                |
|               | (222)         | 2.53               |                |
| TMS           | (111)         | 2.81               | 0.33           |
|               | (200)         | 2.50               |                |
|               | (220)         | 4.06               |                |
|               | (311)         | 4.34               |                |
|               | (222)         | 2.66               |                |

**Table S2.** Half-peak widths and lattice strains of OLA-S-based colloidal AgBiS<sub>2</sub> NCs prepare at 100°C and 120°C.

| Temperature (°C) | Crystal plane | Half-peak wide(nm) | Lattice strain |
|------------------|---------------|--------------------|----------------|
| 100°C            | (111)         | 3.51               | 0.27           |
|                  | (200)         | 2.95               |                |
|                  | (220)         | 2.73               |                |
|                  | (311)         | 3.44               |                |
|                  | (222)         | 2.53               |                |
| 120°C            | (111)         | 2.96               | 0.38           |
|                  | (200)         | 2.66               |                |
|                  | (220)         | 2.32               |                |
|                  | (311)         | 2.38               |                |
|                  | (222)         | 2.29               |                |



**Table S3.** Half-peak widths and lattice strains of 3 mL and 4 mL OLA-S-based colloidal AgBiS<sub>2</sub> NCs.

| Temperature (°C) | Crystal plane | Half-peak wide(nm) | Lattice strain |
|------------------|---------------|--------------------|----------------|
| 3 mL             | (111)         | 3.51               | 0.27           |
|                  | (200)         | 2.95               |                |
|                  | (220)         | 2.73               |                |
|                  | (311)         | 3.44               |                |
|                  | (222)         | 2.53               |                |
| 4 mL             | (111)         | 2.46               | 0.40           |
|                  | (200)         | 1.60               |                |
|                  | (220)         | 1.73               |                |
|                  | (311)         | 2.39               |                |
|                  | (222)         | 2.20               |                |

**Table S4.** Raw material usage, price and yield of AgBiS<sub>2</sub> NCs based on TMS and OLA-S.

| Sulfur Source | Raw Material         | Synthetic Usage | Price(yuan) | Total(yuan) | Yield(%)         |
|---------------|----------------------|-----------------|-------------|-------------|------------------|
| TMS           | Bi(OAc) <sub>3</sub> | 386 mg          | 24.5        | 80.4        | (265 mg)<br>86.9 |
|               | AgOAc                | 134 mg          | 3.0         |             |                  |
|               | OA                   | 5.4 mL          | 4.3         |             |                  |
|               | ODE                  | 15 mL           | 2.6         |             |                  |
|               | TMS                  | 215 µL          | 46.0        |             |                  |
| OLA-S         | Bi(OAc) <sub>3</sub> | 386 mg          | 24.5        | 34.8        | (276 mg)<br>90.5 |
|               | AgOAc                | 134 mg          | 3.0         |             |                  |
|               | OA                   | 5.4 mL          | 4.3         |             |                  |
|               | ODE                  | 10 mL           | 1.8         |             |                  |
|               | OLA                  | 3 mL            | 1.2         |             |                  |
|               | S                    | 96 mg           | 0.003       |             |                  |

## Reference

- Williamson, G. K.; Hall, W. H. X-ray line broadening from filed aluminium and wolfram L'elargissement des raies de rayons x obtenues des limailles d'aluminium et de tungsten Die verbreiterung der roentgeninterferenzlinien von aluminium- und wolframpaenen, *Acta Metallurgica* **1953**, *1*, 22-31.
- Nishimura, K.; Hirotani, D.; Kamarudin, M. A.; Shen, Q.; Toyoda, T.; Iikubo, S.; Minemoto, T.; Yoshino, K.; Hayase, S. Relationship between lattice strain and efficiency for Sn-perovskite solar cells, *ACS Appl. Mater. Interfaces* **2019**, *11*, 31105-31110.
